# Supplementary material
Source: bioRxiv or medRxiv preprint supplement (https://www.biorxiv.org/highwire/filestream/126790/field_highwire_adjunct_files/4/421446-5.pdf)
Supplement: Supplementary file [file 421446-5.pdf]

# Molecular Function

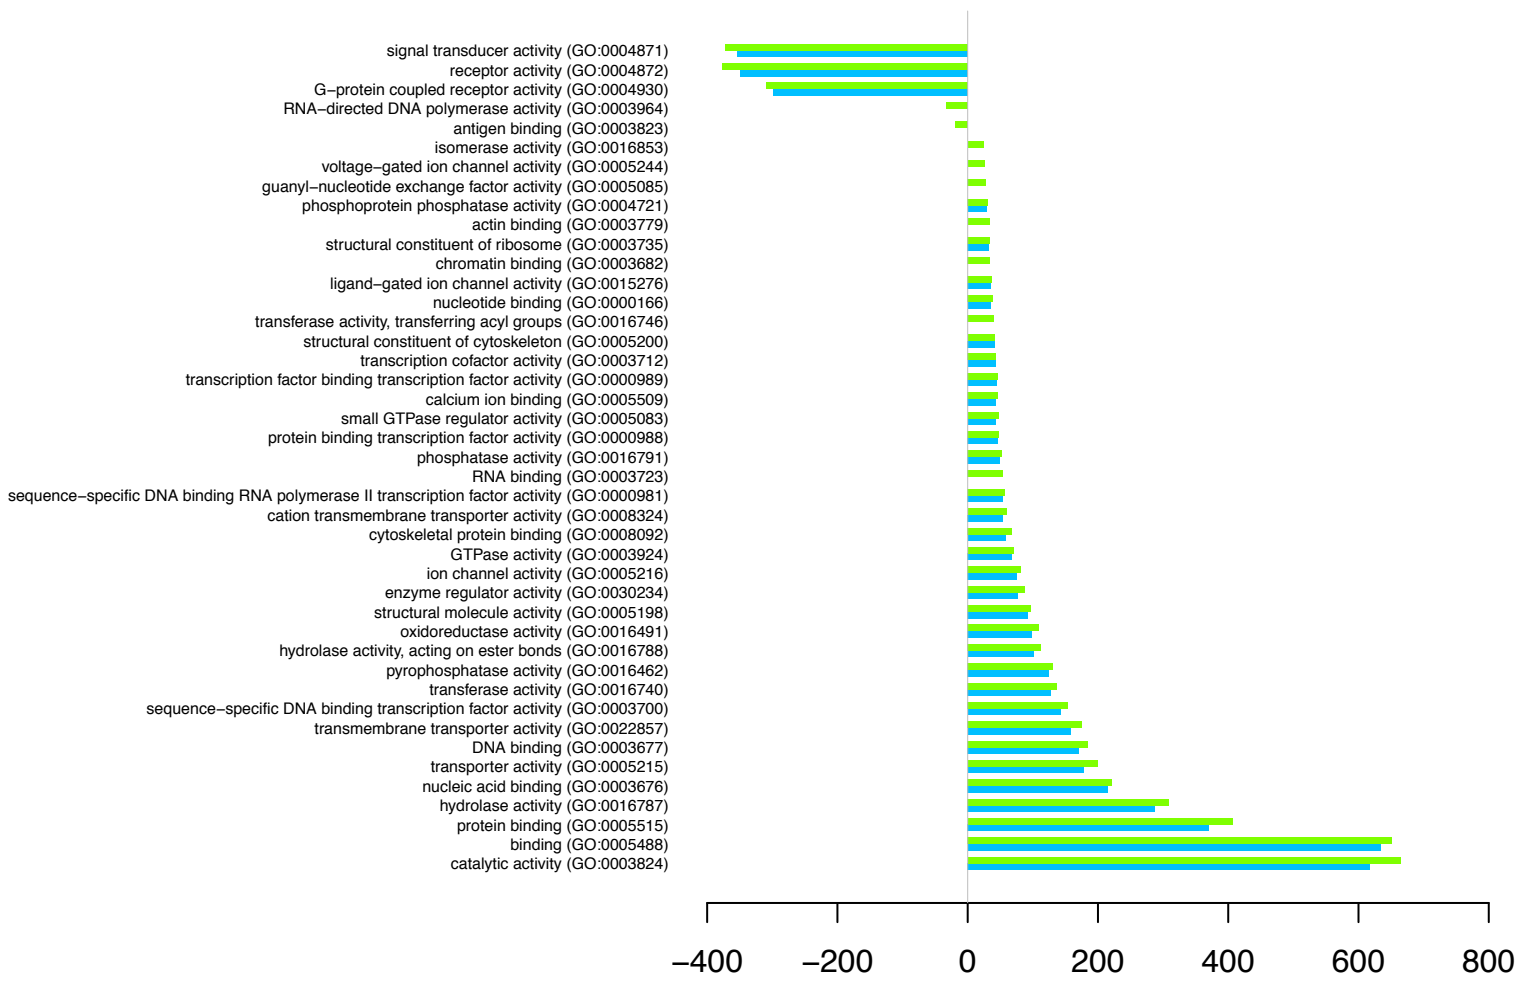

# Gene Count Difference

# Cellular Component

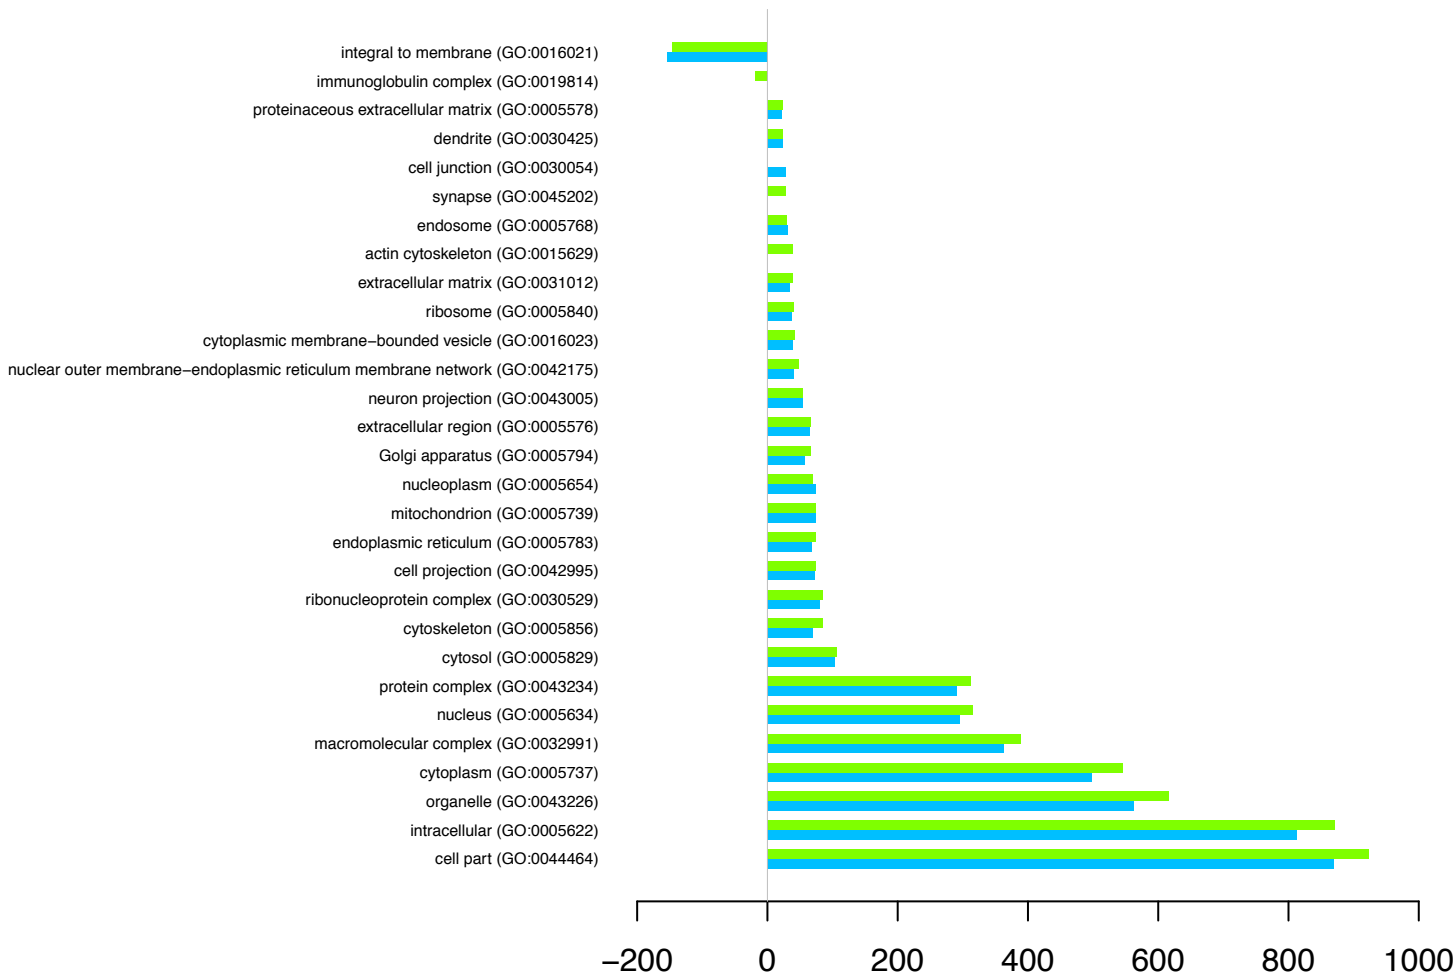

# Gene Count Difference

# Biological Process

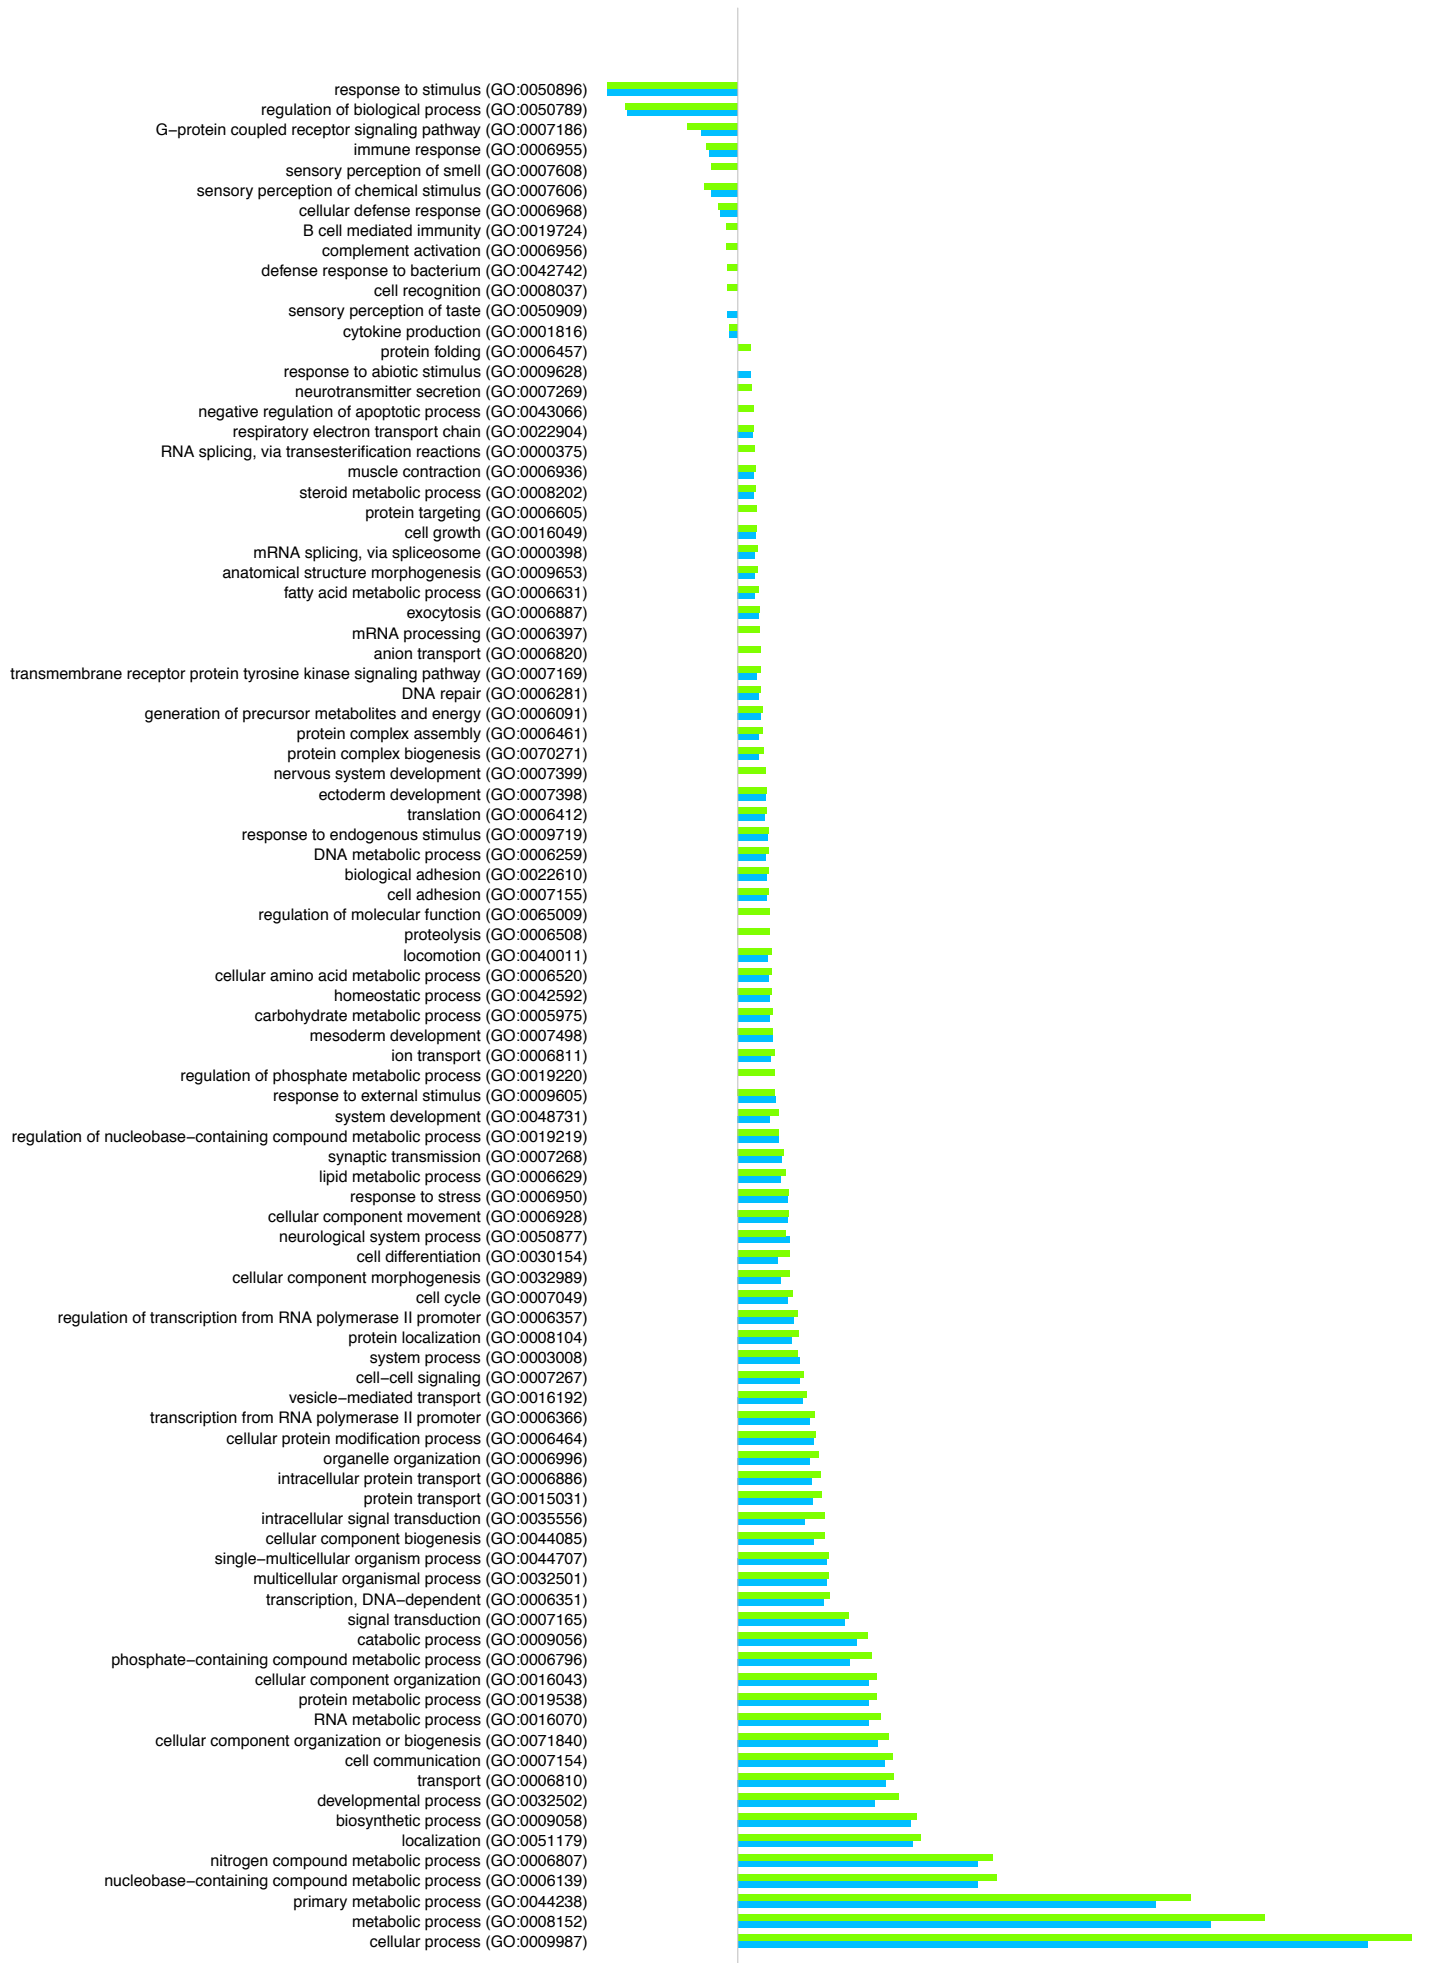

-200 0 200 400 600 800 1000 1200

Gene Count Difference
